# Supplementary material for: The Mental Health and Well-Being Outcomes of Swiping-Based Dating App Use: A Systematic Review and Meta-Analysis
Source: Research Square preprint supplement (doi:10.21203/rs.3.rs-8414384/v1), 2026-01-27
Supplement: Supplementary file 1 [file 069bc5d25731f8019827e31e.pdf]

## Supplementary Material

### Figure S1 – Publication bias analysis with funnel plots:

Twelve funnel plots for publication bias analysis, with each row corresponding to an outcome cluster (appearance, body, wellbeing, distress, sensitivity, dysregulations), and columns showing the original (left) and trim-and-fill adjusted (right) plots.

Table S1 – Publication bias analysis for each outcome cluster.

| Cluster        | k  | Intercept | SE   | 95% CI        | p     | g obs. | g adj. | k imputed |
|----------------|----|-----------|------|---------------|-------|--------|--------|-----------|
| body           | 10 | 0.22      | 0.21 | [-0.20, 0.63] | 0.301 | 0.32   | 0.32   | 0         |
| wellbeing      | 7  | 0.08      | 0.34 | [-0.58, 0.75] | 0.811 | 0.09   | 0.09   | 0         |
| distress       | 13 | -0.08     | 0.10 | [-0.28, 0.12] | 0.429 | 0.25   | 0.25   | 0         |
| appearance     | 11 | 0.14      | 0.22 | [-0.28, 0.57] | 0.504 | 0.28   | 0.28   | 0         |
| sensitivity    | 5  | 0.25      | 0.33 | [-0.40, 0.89] | 0.458 | 0.28   | 0.28   | 0         |
| dysregulations | 6  | 0.65      | 0.26 | [0.13, 1.17]  | 0.014 | 0.44   | 0.48   | 1         |

*Notes.* *Intercept*, *SE*, *95% CI*, and *p* are from Egger's regression test for funnel plot asymmetry. *g obs.* is the observed pooled effect size; *g adj.* is the adjusted pooled effect after trim-and-fill. *k imputed* is the number of studies imputed by trim-and-fill.

## Appendix A – Search strings per database

### PUBMED

("dating app"[ti] OR "mobile dating"[ti] OR "online dating"[ti] OR Tinder[ti] OR Bumble[ti] OR Grindr[ti] OR Hinge[ti] OR Badoo[ti] OR OkCupid[ti]) AND ("mental health"[ti] OR "mental illness"[ti] OR "mental well\*" [ti] OR emoti\*[ti] OR affect\*[ti] OR anxi\*[ti] OR depress\*[ti] OR suicid\*[ti] OR "self-harm\*" [ti] OR mood[ti] OR stress[ti] OR distress[ti] OR "well-being"[ti] OR wellbeing[ti] OR "life satisfaction"[ti] OR "quality of life"[ti] OR "self-esteem"[ti] OR "self concept"[ti] OR "self-worth"[ti] OR "self worth"[ti] OR "body image"[ti] OR "body dissatisfaction"[ti] OR "body satisfaction"[ti] OR "body esteem"[ti] OR "body dysmorph\*" [ti] OR "body aware\*" [ti] OR "body shame"[ti] OR "body percept\*" [ti] OR "weight control"[ti] OR compulsi\*[ti] OR "problem\* use"[ti] OR addict\*[ti] OR depend\*[ti] OR reject\*[ti] OR sensitiv\*[ti] OR isolat\*[ti] OR lonel\*[ti] OR symptom\*[ti] OR disorder\*[ti])

### PSYCINFO

((dating app\* or swiping app\* or swipe-based dating or mobile dating or online dating or geolocation dating or Tinder or Bumble or Grindr or Hinge or Badoo or OkCupid or Plenty of Fish or Feeld or Jaumo) and (mental health or mental illness or mental well\* or emoti\* or affect\* or anxi\* or depress\* or suicid\* or self-harm\* or mood or stress or distress or well-being or wellbeing or life satisfaction or quality of life or self-esteem or self concept or self-worth or self worth or body image or body dissatisfaction or body satisfaction or body esteem or body dysmorph\* or body aware\* or body shame or body percept\* or weight control or compulsi\* or problem\* or addict\* or depend\* or reject\* or sensitiv\* or isolat\* or lonel\* or symptom\* or disorder\*)) .ti.

### SCOPUS

TITLE ( "dating app\*" OR "swiping app\*" OR "swipe-based dating" OR "mobile dating" OR "online dating" OR "geolocation dating" OR tinder OR bumble OR grindr OR hinge OR badoo OR okcupid OR "Plenty of Fish" OR feeld OR jaumo ) AND TITLE ( "mental health" OR "mental illness" OR "mental well\*" OR emoti\* OR affect\* OR anxi\* OR depress\* OR suicid\* OR "self-harm\*" OR mood OR stress OR distress OR "well-being" OR wellbeing OR "life satisfaction" OR "quality of life" OR "self-esteem" OR "self concept" OR "self-worth" OR "self worth" OR "body image" OR "body dissatisfaction" OR "body satisfaction" OR "body esteem" OR "body dysmorph\*" OR "body aware\*" OR "body shame" OR "body percept\*" OR "weight control" OR compulsi\* OR "problem\* use" OR addict\* OR depend\* OR reject\* OR sensitiv\* OR isolat\* OR lonel\* OR symptom\* OR disorder\* )

### WOS

TS=( "dating app\*" OR "swiping app\*" OR "swipe-based dating" OR "mobile dating" OR "online dating" OR "geolocation dating" OR Tinder OR Bumble OR Grindr OR Hinge OR Badoo OR OkCupid OR "Plenty of Fish" OR Feeld OR Jaumo ) AND TS=( "mental health" OR "mental illness" OR "mental well\*" OR emoti\* OR affect\* OR anxi\* OR depress\* OR suicid\* OR "self-harm\*" OR mood OR stress OR distress OR "well-being" OR wellbeing OR "life satisfaction" OR "quality of life" OR "self-esteem" OR "self concept" OR "self-worth" OR "self worth" OR "body image" OR "body dissatisfaction" OR "body satisfaction" OR "body esteem" OR "body dysmorph\*" OR "body aware\*" OR "body shame" OR "body percept\*" OR "weight control" OR compulsi\* OR "problem\*" OR addict\* OR depend\* OR reject\* OR sensitiv\* OR isolat\* OR lonel\* OR symptom\* OR disorder\* )
